# Supplementary material for: Carrier dynamics in two-dimensional perovskites: Dion–Jacobson vs. Ruddlesden–Popper thin films
Source: Royal Society of Chemistry journal article supplement (doi:10.1039/d1ta09549h), 2022-01-01
Supplement: d1ta09549h1.pdf [file d1ta09549h1.pdf]

Supporting information

## **Carrier Dynamics in Two-Dimensional Perovskites: Dion-Jacobson vs. Ruddlesden-Popper thin films**

Chaochao Qin,<sup>a</sup> Liuhong Xu,<sup>a</sup> Zhongpo Zhou,<sup>\*a</sup> Jian Song,<sup>a</sup> Shuhong Ma,<sup>a</sup> Zhaoyong Jiao,<sup>a</sup> Yuhai Jiang<sup>\*b</sup>

<sup>a</sup>Henan Key Laboratory of Infrared Materials and Spectrum Measures and Applications, School of Physics, Henan Normal University, Xixiang, 453007, China.

<sup>b</sup>Shanghai Advanced Research Institute, Chinese Academy of Sciences, Shanghai 201210, China.

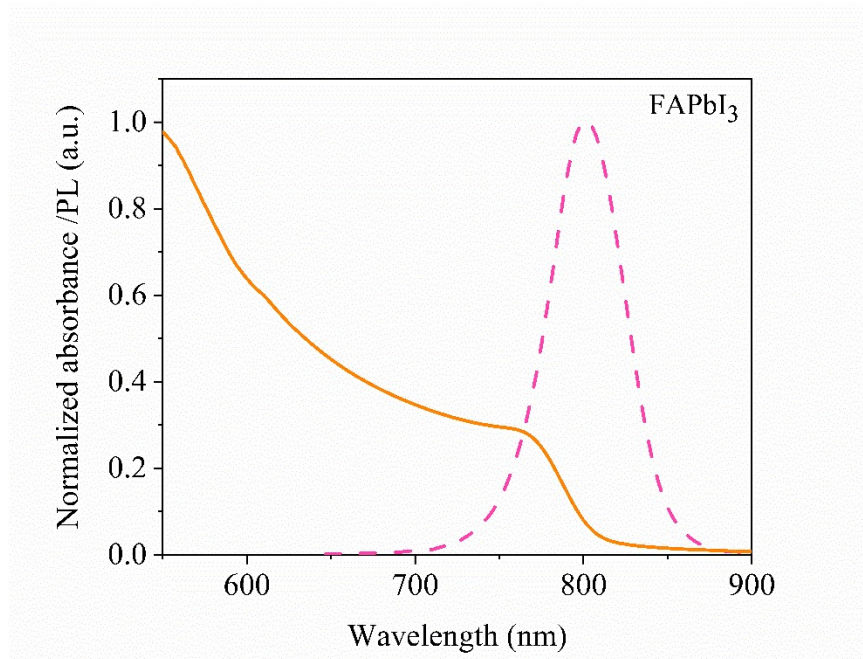

Figure S1. The steady-state absorption (solid line) and photoluminescence (dashed line) spectra for FAPbI<sub>3</sub> ( $n=\infty$  for (PDMA)FA<sub>*n-1*</sub>Pb<sub>*n*</sub>I<sub>*3n+1*</sub> and (PEA)<sub>2</sub>FA<sub>*n-1*</sub>Pb<sub>*n*</sub>I<sub>*3n+1*</sub>).

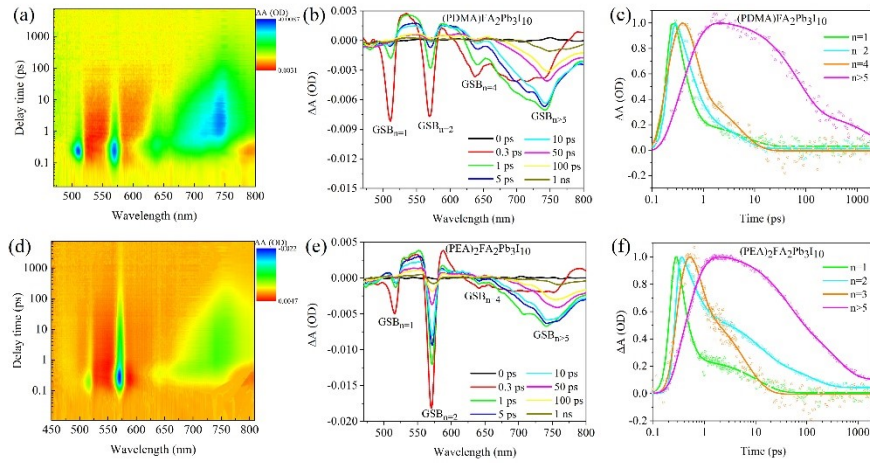

Figure S2. TA measurements for (PDMA)FA<sub>n-1</sub>Pb<sub>n</sub>I<sub>3n+1</sub> ( $\langle n \rangle = 3$ ) films and (PEA)<sub>2</sub>FA<sub>n-1</sub>Pb<sub>n</sub>I<sub>3n+1</sub> ( $\langle n \rangle = 3$ ) films excited from front side (air side). (a) (d) Time- and wavelength-dependent TA images. (b) (e) TA spectra at selected probe times. (c) (f) TA spectra for different n phases as a function of delay time.

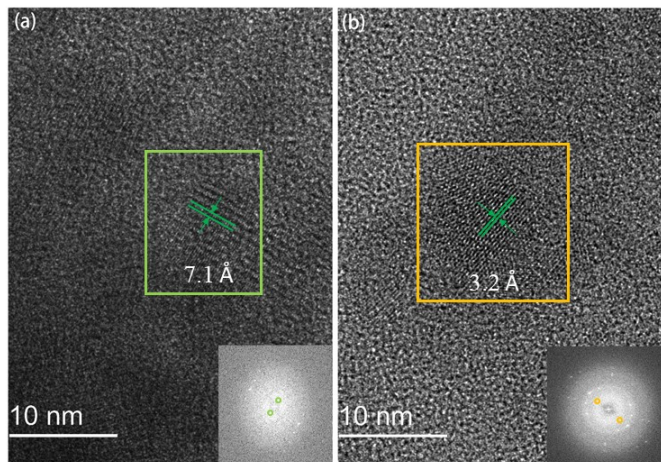

Figure S3. (a) HRTEM image of the (PDMA)PbI<sub>4</sub> film with  $d=7.1$  Å for (111) plane. (b) HRTEM image of the (PEA)<sub>2</sub>PbI<sub>4</sub> film with  $d=3.2$  Å for (0010) plane. Insets: Fast Fourier transforms (FFT) of the selected area diffraction.
